# Supplementary material for: piRNA identification based on motif discovery
Source: Royal Society of Chemistry journal article supplement (doi:10.1039/c4mb00447g), 2014-08-29
Supplement: c4mb00447g1.xlsx [file c4mb00447g1.xlsx]

## Sheet: Sheet1
Table S1. The motifs used and the F-score.
motifs	F-score
ANAA	0.044701
CNTG	0.042748
CNTA	0.042698
CTNT	0.041646
CNTC	0.041185
CAC	0.040529
CNTNT	0.039217
GNCA	0.035025
ATA	0.028029
ANTT	0.025241
TGNNT	0.02471
GNAC	0.023792
CTT	0.023612
ANNCT	0.023527
AGNG	0.023306
TGNT	0.023252
AGNA	0.023052
CAT	0.022994
GNAA	0.022907
GAA	0.022754
GNCNA	0.022683
GNGT	0.022633
GGT	0.022373
TCNC	0.022342
TCNT	0.022271
GCNT	0.022232
ACNA	0.022017
TANC	0.022002
GCA	0.02198
CANT	0.021797
CCA	0.021629
AANNC	0.021617
GNAG	0.021574
TGNNG	0.021405
TNGNT	0.021353
CTNNG	0.021228
CAA	0.021137
ACA	0.021124
TAC	0.021113
GNTG	0.021065
TNNGT	0.020708
ANTNT	0.020667
ANCNA	0.020627
TCNNT	0.020552
TANG	0.020511
GNANT	0.020392
CNAC	0.02035
ATNC	0.0203
TTG	0.020274
ATNNT	0.019856
CTA	0.019657
TAA	0.019642
GNGNA	0.019432
ATNNG	0.019299
ATG	0.01927
TNNTG	0.019228
AGNNA	0.019177
TGNG	0.019131
TTA	0.018993
TNTG	0.018949
GNGA	0.018902
TANNC	0.01889
GNAT	0.018803
CCNA	0.018688
TTNC	0.018406
CTNNA	0.018376
TNGNG	0.018363
TNNAT	0.018315
ATC	0.018239
CTC	0.018033
TAG	0.01801
TNGC	0.018003
AANNG	0.017986
TNTNC	0.017909
ACT	0.01779
ACNT	0.01771
TNGNA	0.017648
TNANA	0.01764
GTNG	0.017623
CGT	0.01756
ANTA	0.017438
ATNA	0.017352
TTNT	0.017299
TNCNC	0.017298
TNNTC	0.017214
GNCT	0.017165
ANNTC	0.017148
ANAG	0.017121
TNCA	0.017069
TNTC	0.017047
ANNTT	0.017026
TNCT	0.016973
GNCNT	0.01697
AGG	0.016965
TTNNT	0.016927
ANTNG	0.016735
CNANA	0.016595
TANA	0.01638
CNNAT	0.016364
ANTC	0.01621
TCNA	0.016043
TANNA	0.01604
TNGA	0.015854
CNNTT	0.015805
TNTNA	0.015675
GNANG	0.015621
GNTNG	0.015591
AAG	0.015526
GTNNA	0.015425
TNGG	0.015345
ACNNA	0.015316
AGT	0.01528
TGA	0.015169
ATNNC	0.015128
CANA	0.015095
ANNAG	0.015091
AANT	0.015038
GANT	0.014985
TNNTA	0.014928
TCC	0.014903
TTNG	0.014895
CCNT	0.014804
ANGG	0.014738
TGNA	0.014735
TNGT	0.014734
ANGNA	0.014692
TTC	0.014647
AANNA	0.014573
CAG	0.014573
CGA	0.014474
GTC	0.014472
CNTNG	0.014343
AANG	0.014221
TNNAC	0.014221
TCG	0.014198
TTT	0.014127
TNAA	0.014113
AAC	0.014092
ATNG	0.014077
TNTA	0.013943
TTNNG	0.01394
ANAC	0.013868
GANG	0.013866
AAT	0.01375
CTNG	0.013747
ANGT	0.013693
TGT	0.013629
ANNAA	0.013579
CNANG	0.013419
TNNGA	0.013377
TCT	0.013348
ANNTA	0.013196
GTA	0.013184
GAT	0.013155
GAC	0.013153
CTG	0.013149
TANNG	0.013149
GANNG	0.01309
ACG	0.012772
CTNNT	0.012769
TNTT	0.012611
ANNTG	0.012592
TNANG	0.012506
ANTNA	0.012443
TGG	0.012434
CCT	0.012423
ANANG	0.012422
ATNT	0.012323
GCNNA	0.012256
GTNNC	0.01224
TAT	0.01221
GNNTA	0.012124
TCNNA	0.01212
TNNGC	0.012103
GGA	0.012024
ANTG	0.011991
ANANA	0.011963
ATT	0.011938
TANNT	0.011699
GNNAA	0.011662
CNAT	0.01165
TANT	0.011642
GTNNT	0.011633
TNNCT	0.011545
AGA	0.011489
CNTNC	0.011427
GTNT	0.011399
ANCA	0.011343
GNNTT	0.011232
AANA	0.01118
TTNNA	0.011121
GAG	0.010999
TNAT	0.01099
TGNC	0.01097
ANGNC	0.010833
ANCNT	0.010755
TNANT	0.010665
TGNNC	0.010536
TNTNG	0.010521
ANGC	0.010476
TNNCA	0.010352
TNNTT	0.010334
TNNAG	0.010295
ANCT	0.010279
GNTA	0.010257
GNANA	0.01024
ACNNT	0.010099
GCNA	0.010033
GANNA	0.010009
TNNAA	0.0099324
GTT	0.0099128
TTNA	0.0096823
ANANC	0.0096208
ANNGA	0.0095958
TNAG	0.0095476
CNANT	0.0095058
GGNA	0.0093911
ANNCA	0.0093303
GTG	0.0092852
GANNT	0.009204
CNCNT	0.009198
CNNTG	0.0091447
AGNNT	0.0090877
ANGA	0.0090407
CNAA	0.0090192
GTNC	0.0088171
CNTT	0.0087945
ANGNT	0.0087368
AGNT	0.0086737
TNCNA	0.0086727
GNTNT	0.0086567
ANAT	0.0086389
TTNNC	0.0086307
AANC	0.0085791
AAA	0.0083873
GNNTG	0.008328
CANNG	0.0082997
ANANT	0.0082027
AANNT	0.0081453
CNCNA	0.0081121
CANNT	0.0080012
CANG	0.007656
GNNAT	0.0075493
CNAG	0.0074949
ANNAT	0.007439
TGNNA	0.0068767
TGC	0.00664
CNNAG	0.0060769
ANNGT	0.0058689
ANGNG	0.0057721
GNTT	0.0056445
GTNNG	0.0056359
GANA	0.0047489
CNCT	0.0037256
TNTNT	0.0022479
TNGNC	0.001692
TNCNT	0.0016619
ATNNA	0.0012872
